# Supplementary material for: Influence of Gold Nanoantennas on the Photoluminescence of Silicon Nanocrystals
Source: MDPI journal article supplement (doi:10.3390/photonics9120985), 2022-12-15
Supplement: s1 [file s1]

Archive with 1 entries (1 files):
- photonics-2081818-supplementary.pdf
